# Supplementary material
Source: PubMed Central journal article supplement (PMC8776354)

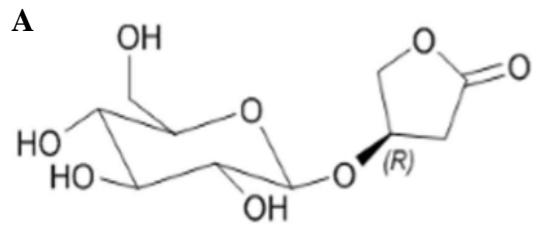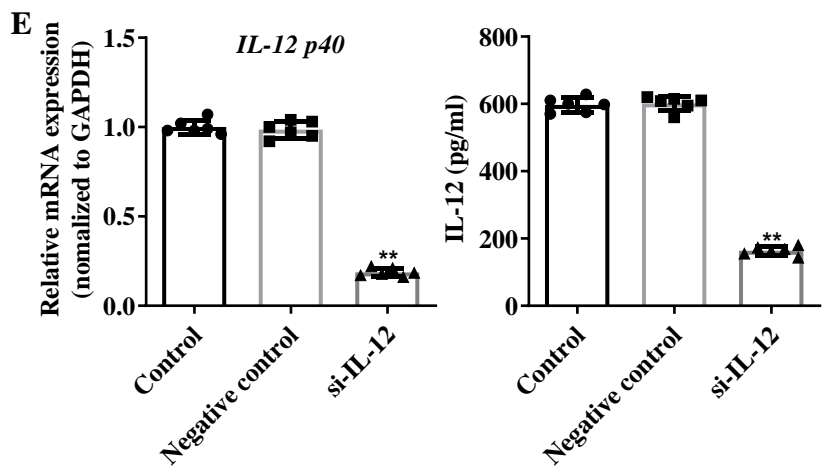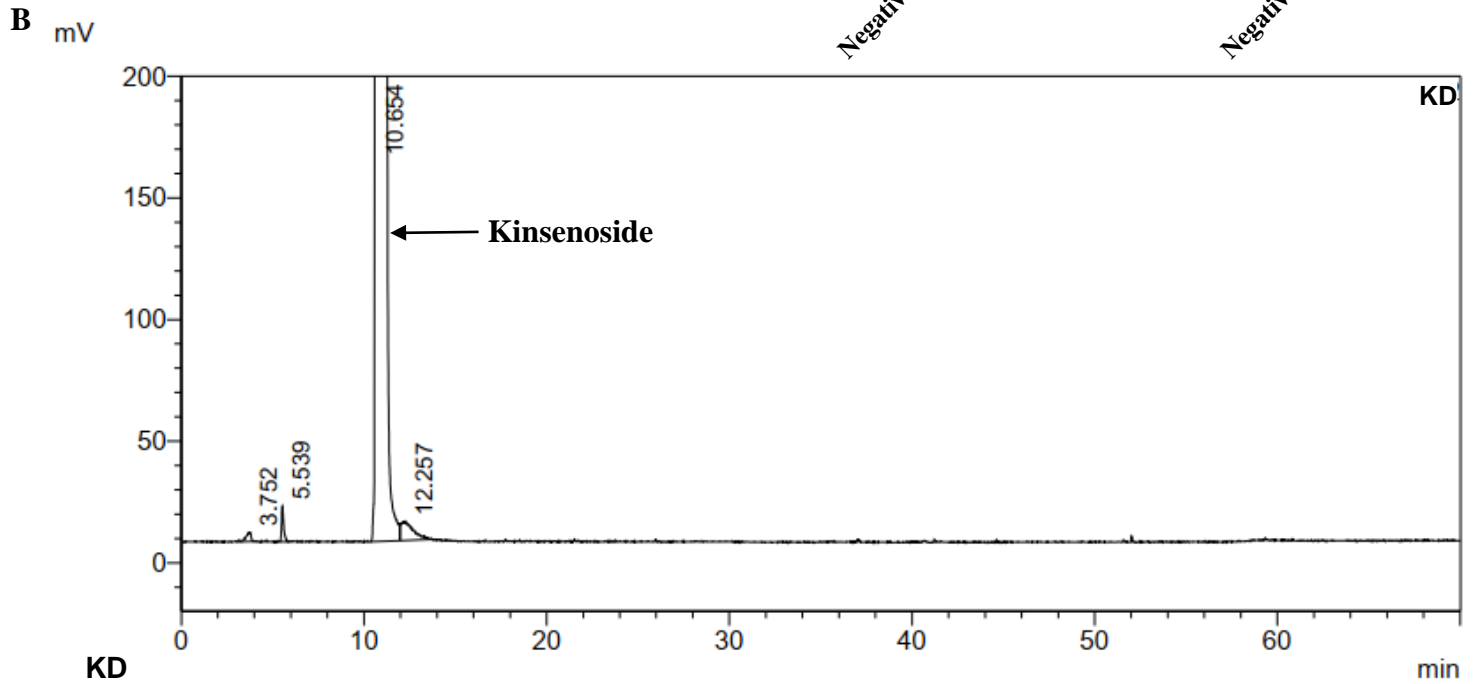

| Peak# | Ret. Time | Area     | Height  | Area%   | Number of Theoretical Plate | Tailing Factor | Resolution(USP) |
|-------|-----------|----------|---------|---------|-----------------------------|----------------|-----------------|
| 1     | 3.752     | 69502    | 3820    | 0.126   | 841                         | 0.687          | --              |
| 2     | 5.539     | 119554   | 14509   | 0.217   | 11171                       | 1.534          | 4.915           |
| 3     | 10.654    | 54658472 | 1407273 | 98.982  | 3721                        | 4.418          | 11.263          |
| 4     | 12.257    | 373268   | 7722    | 0.676   | 1453                        | --             | 1.615           |
| Total |           | 55220796 | 1433325 | 100.000 |                             |                |                 |

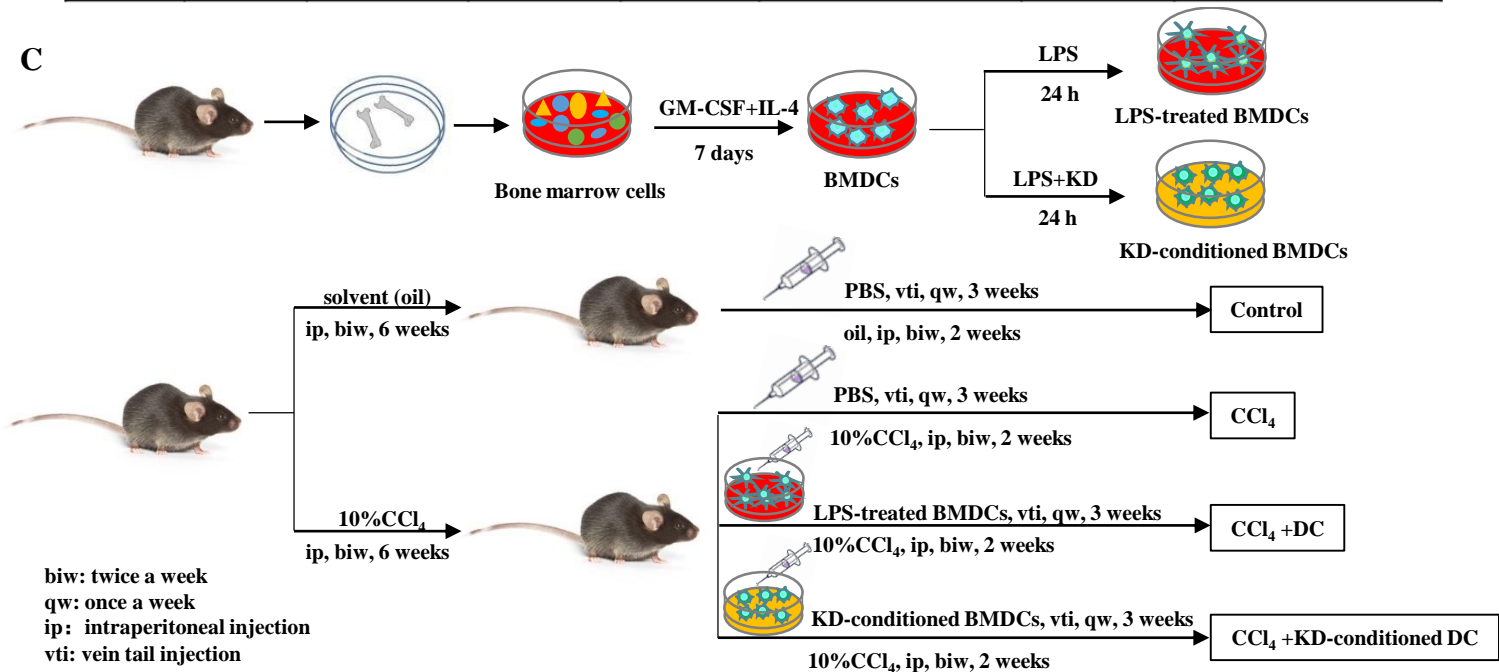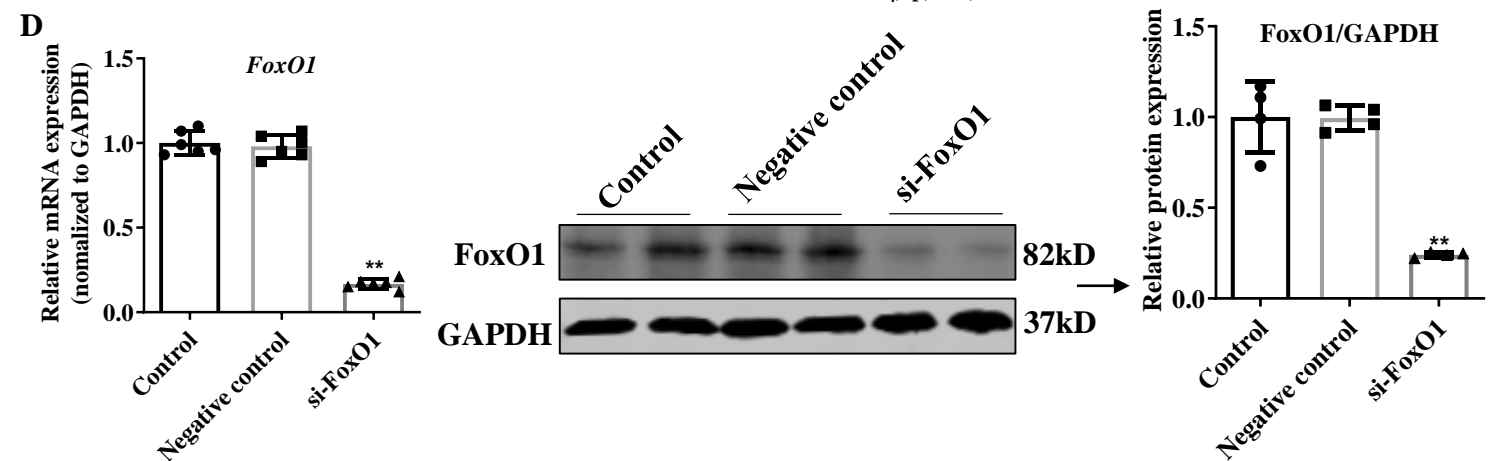

Supplement: mmc2.pdf [file mmc2.pdf]
