# Supplementary material
Source: PubMed Central journal article supplement (PMC8776354)

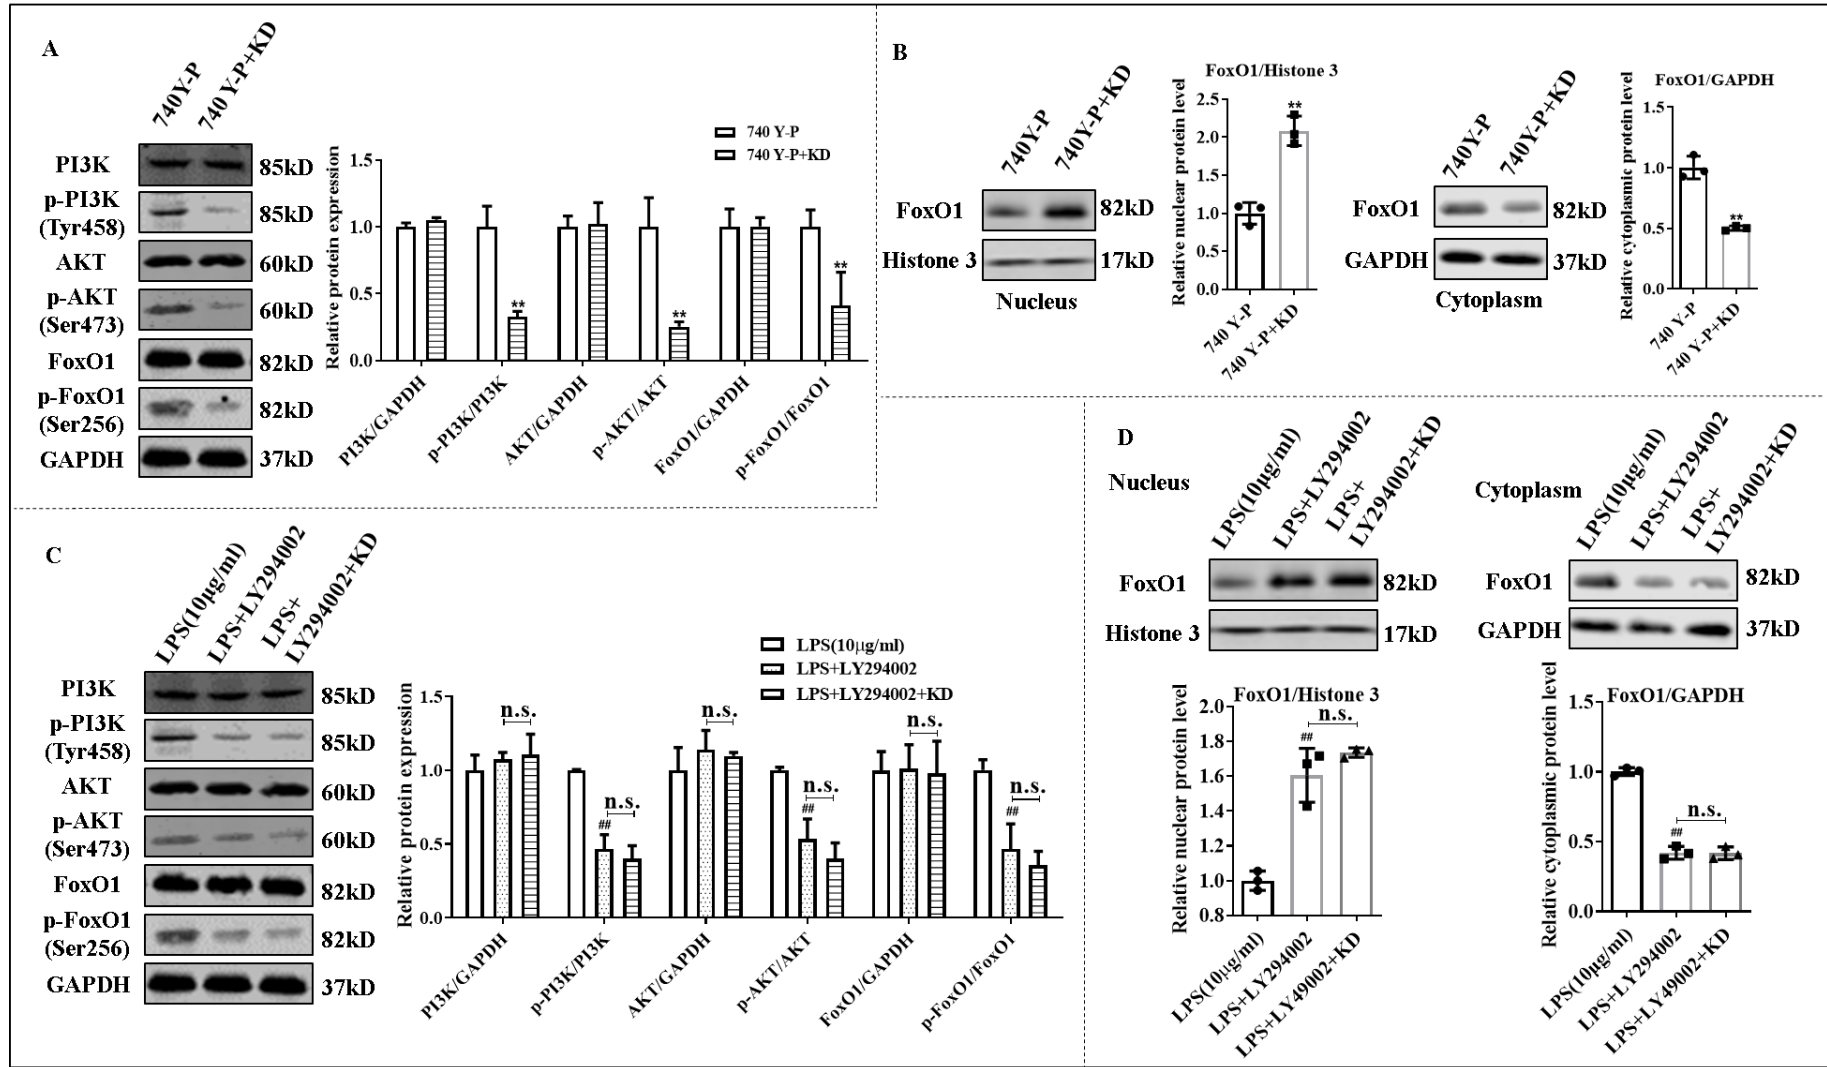

Supplement: mmc10.pdf [file mmc10.pdf]

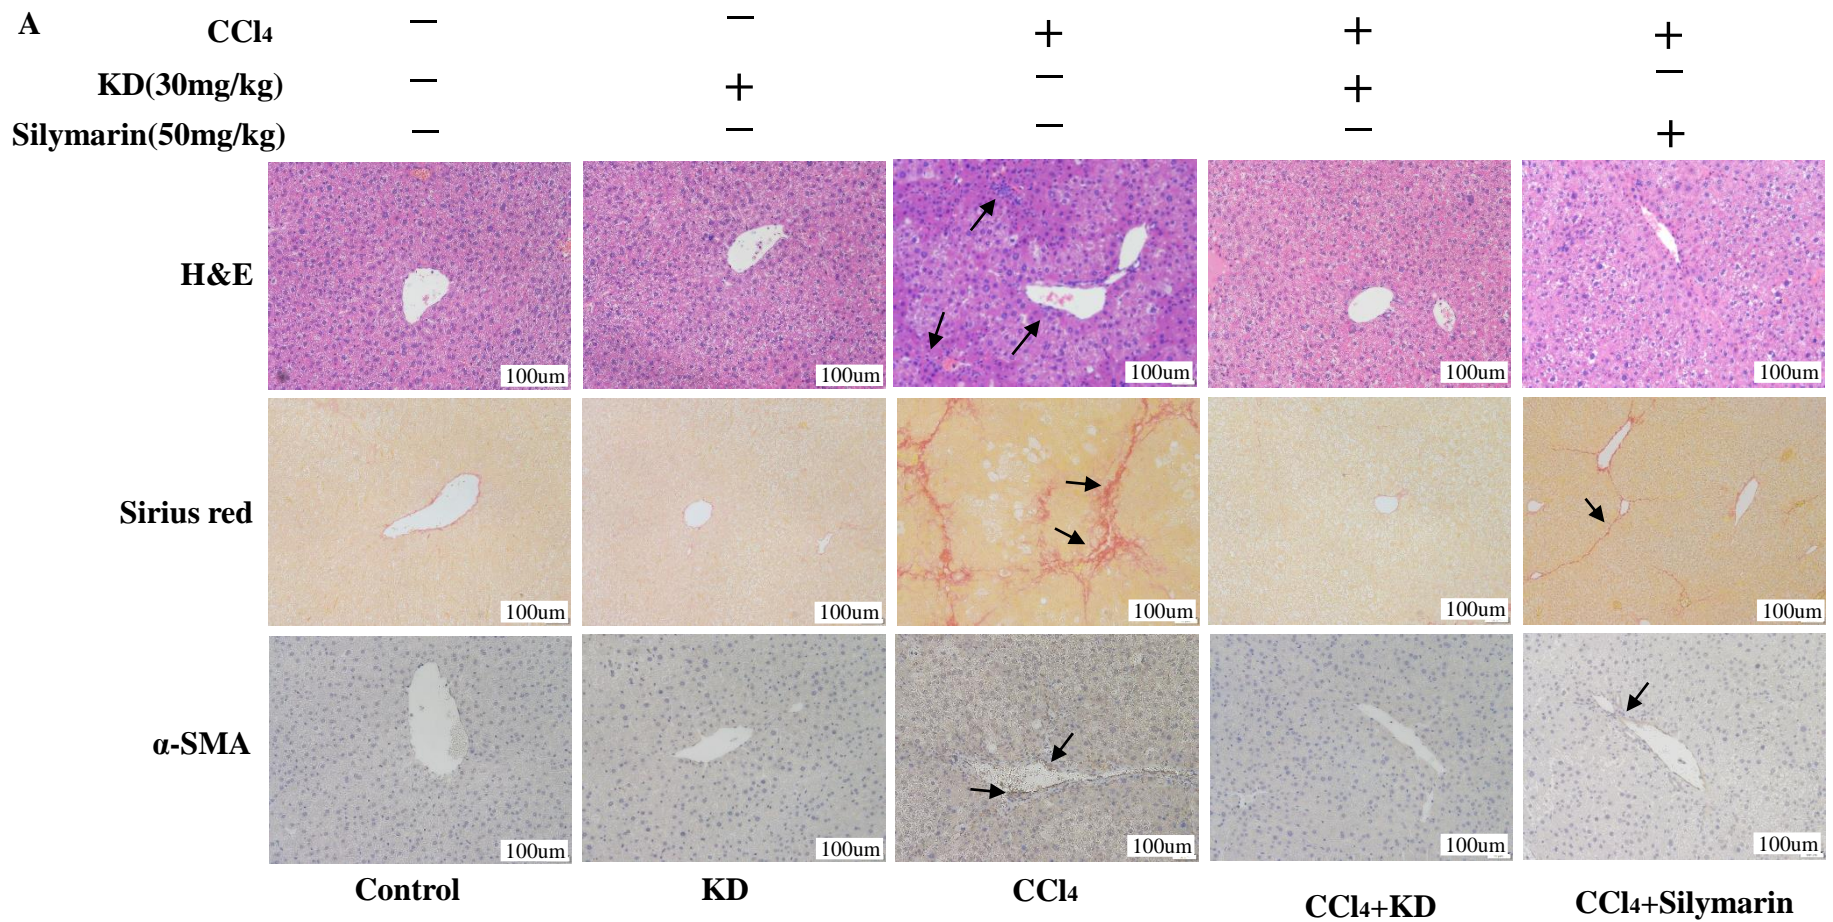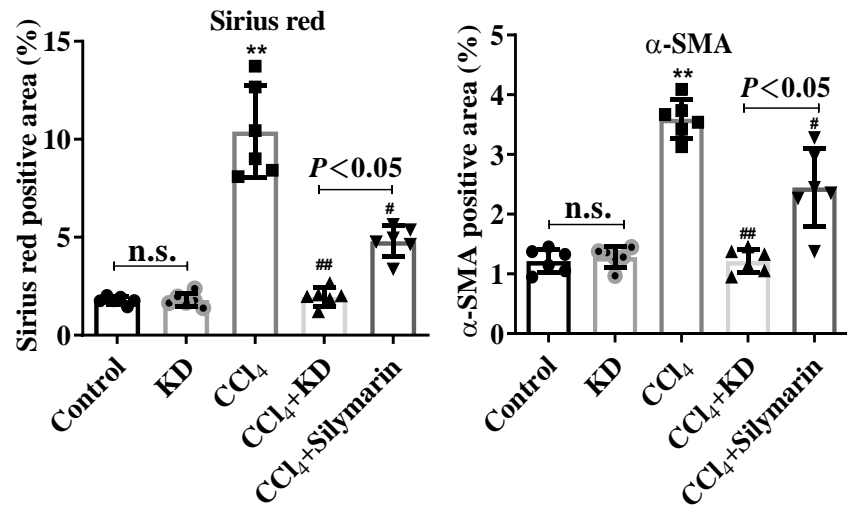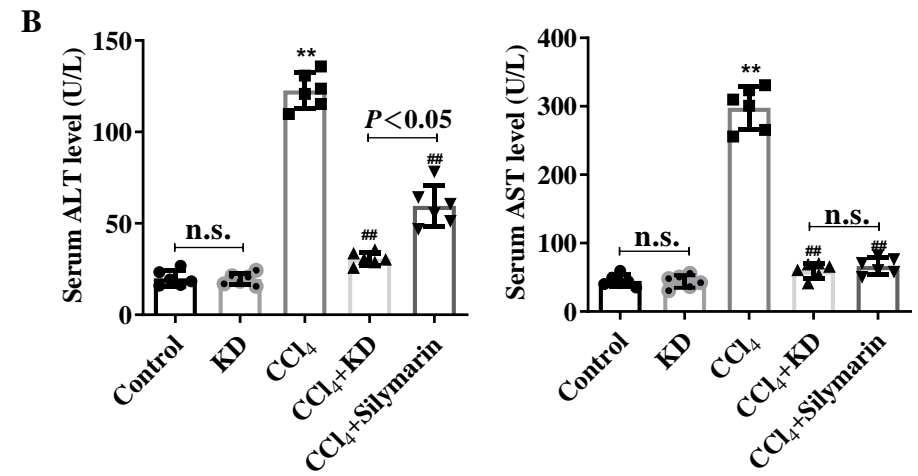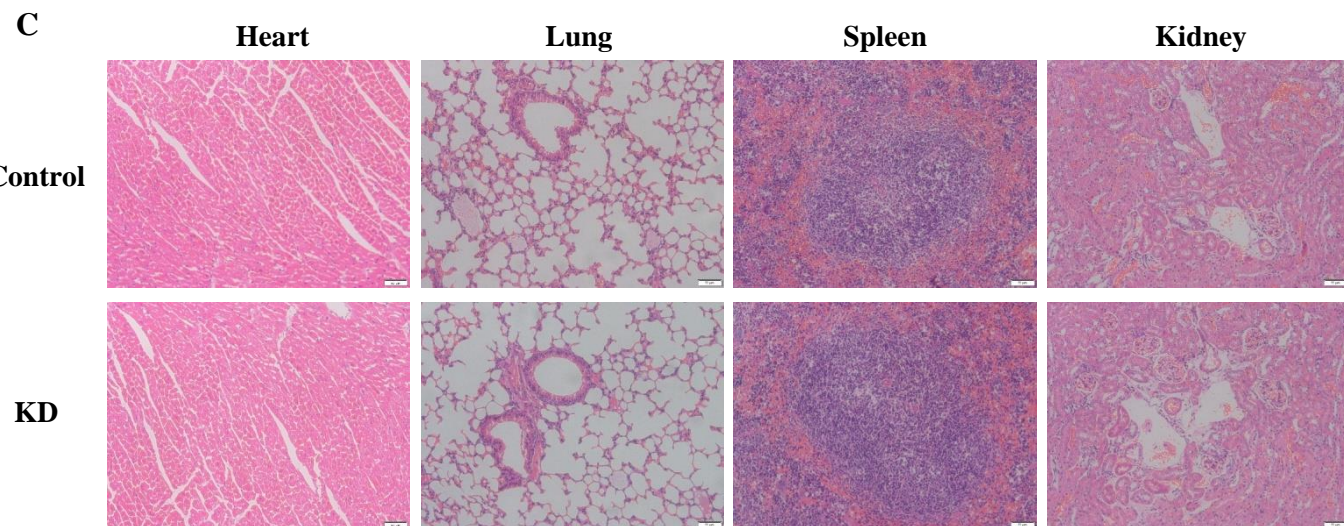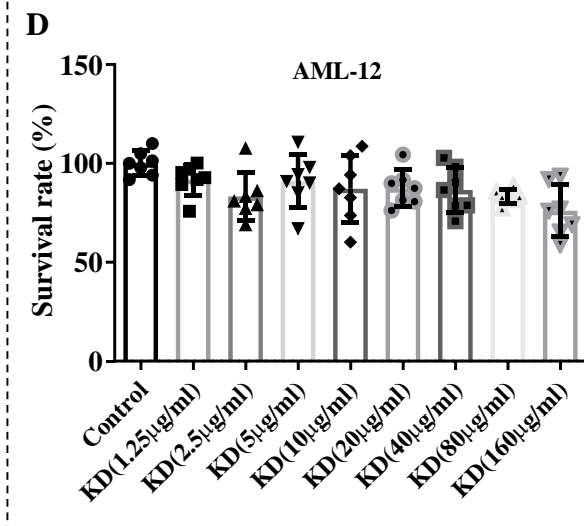

Supplement: mmc3.pdf [file mmc3.pdf]

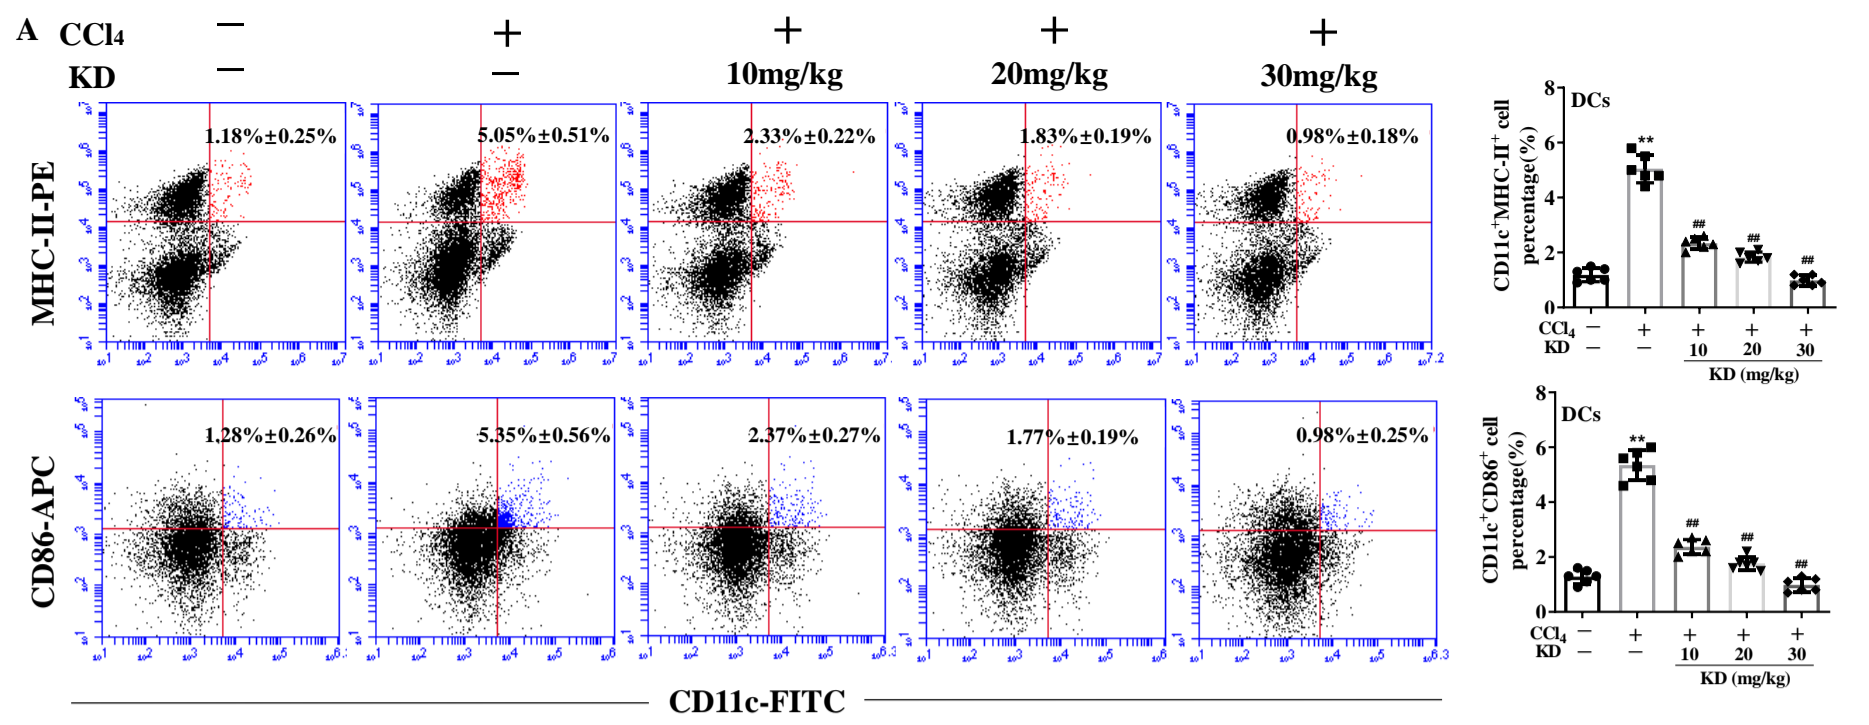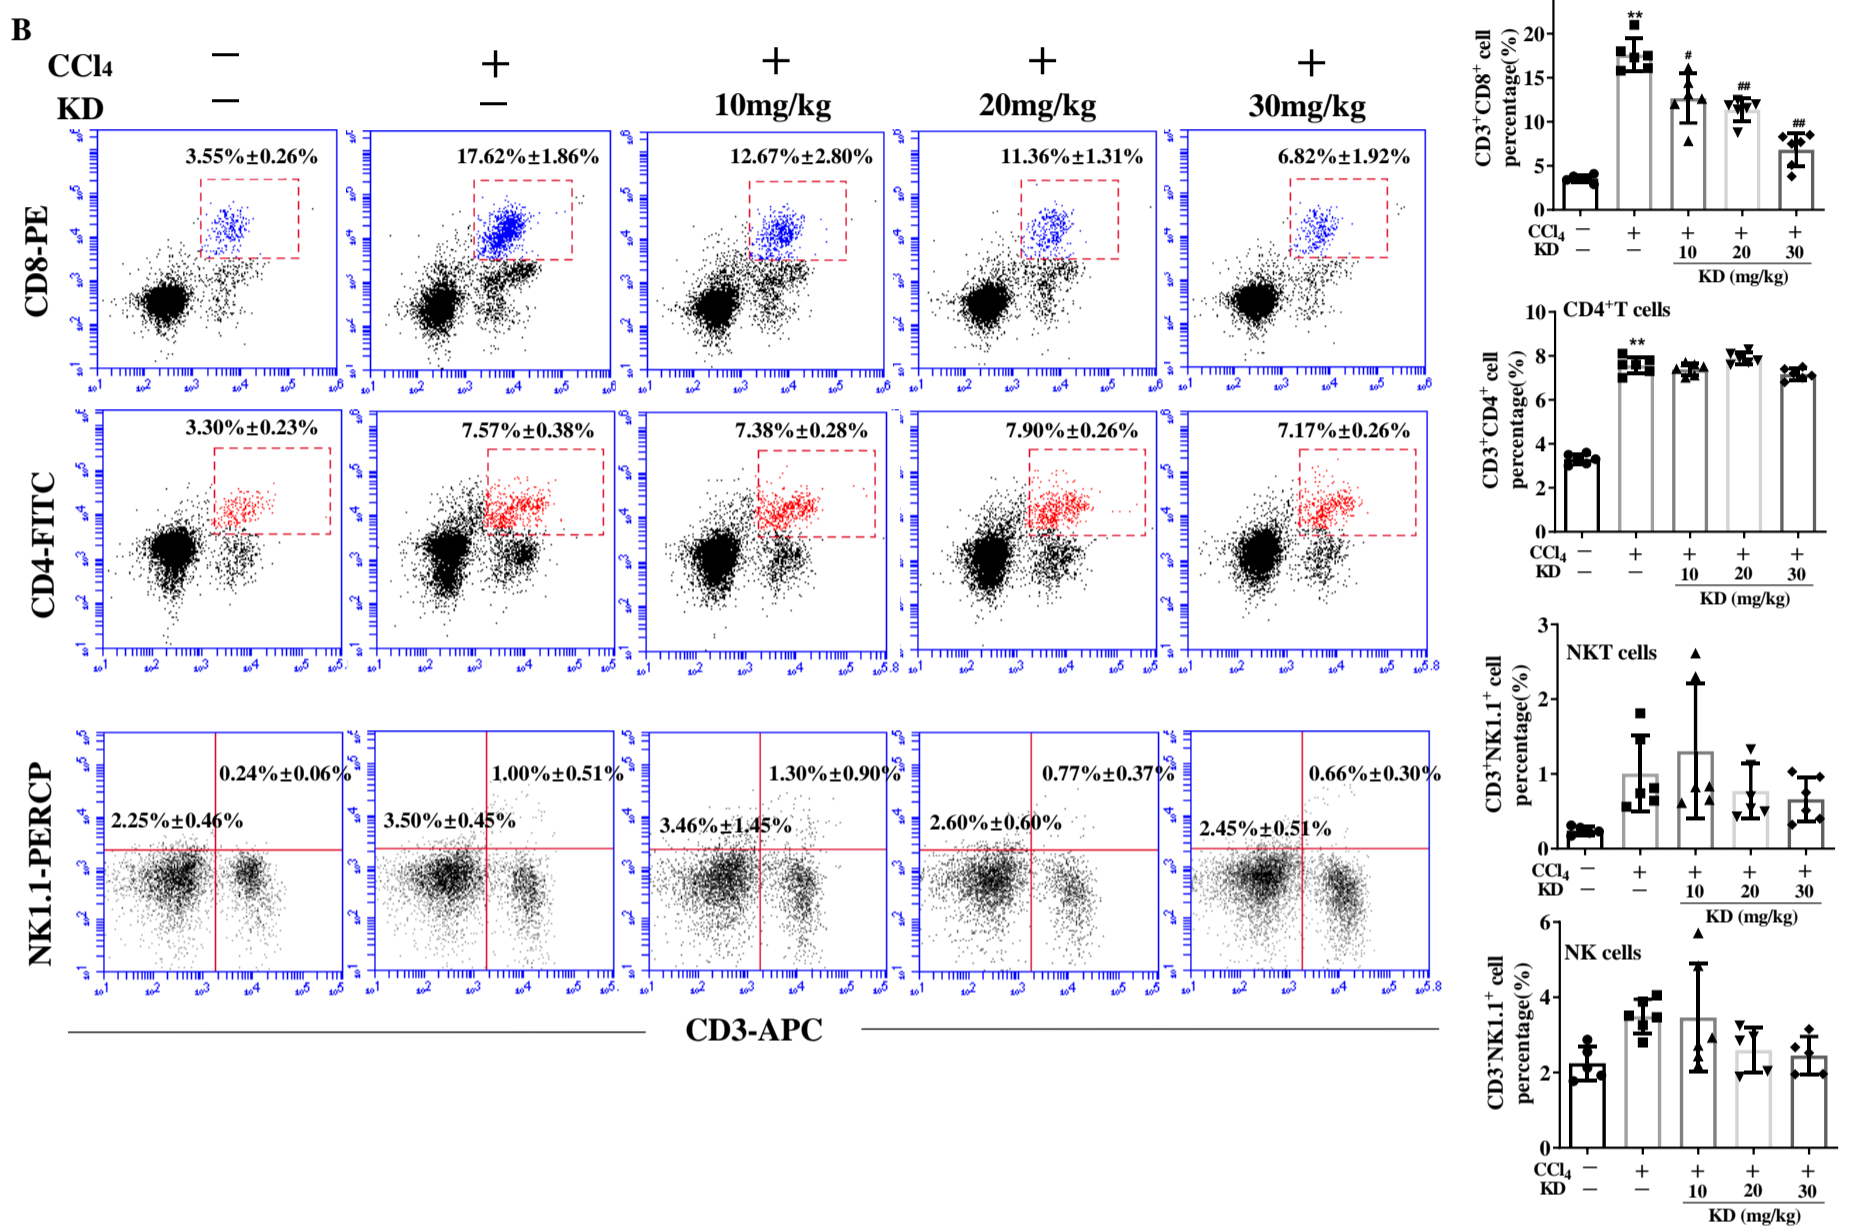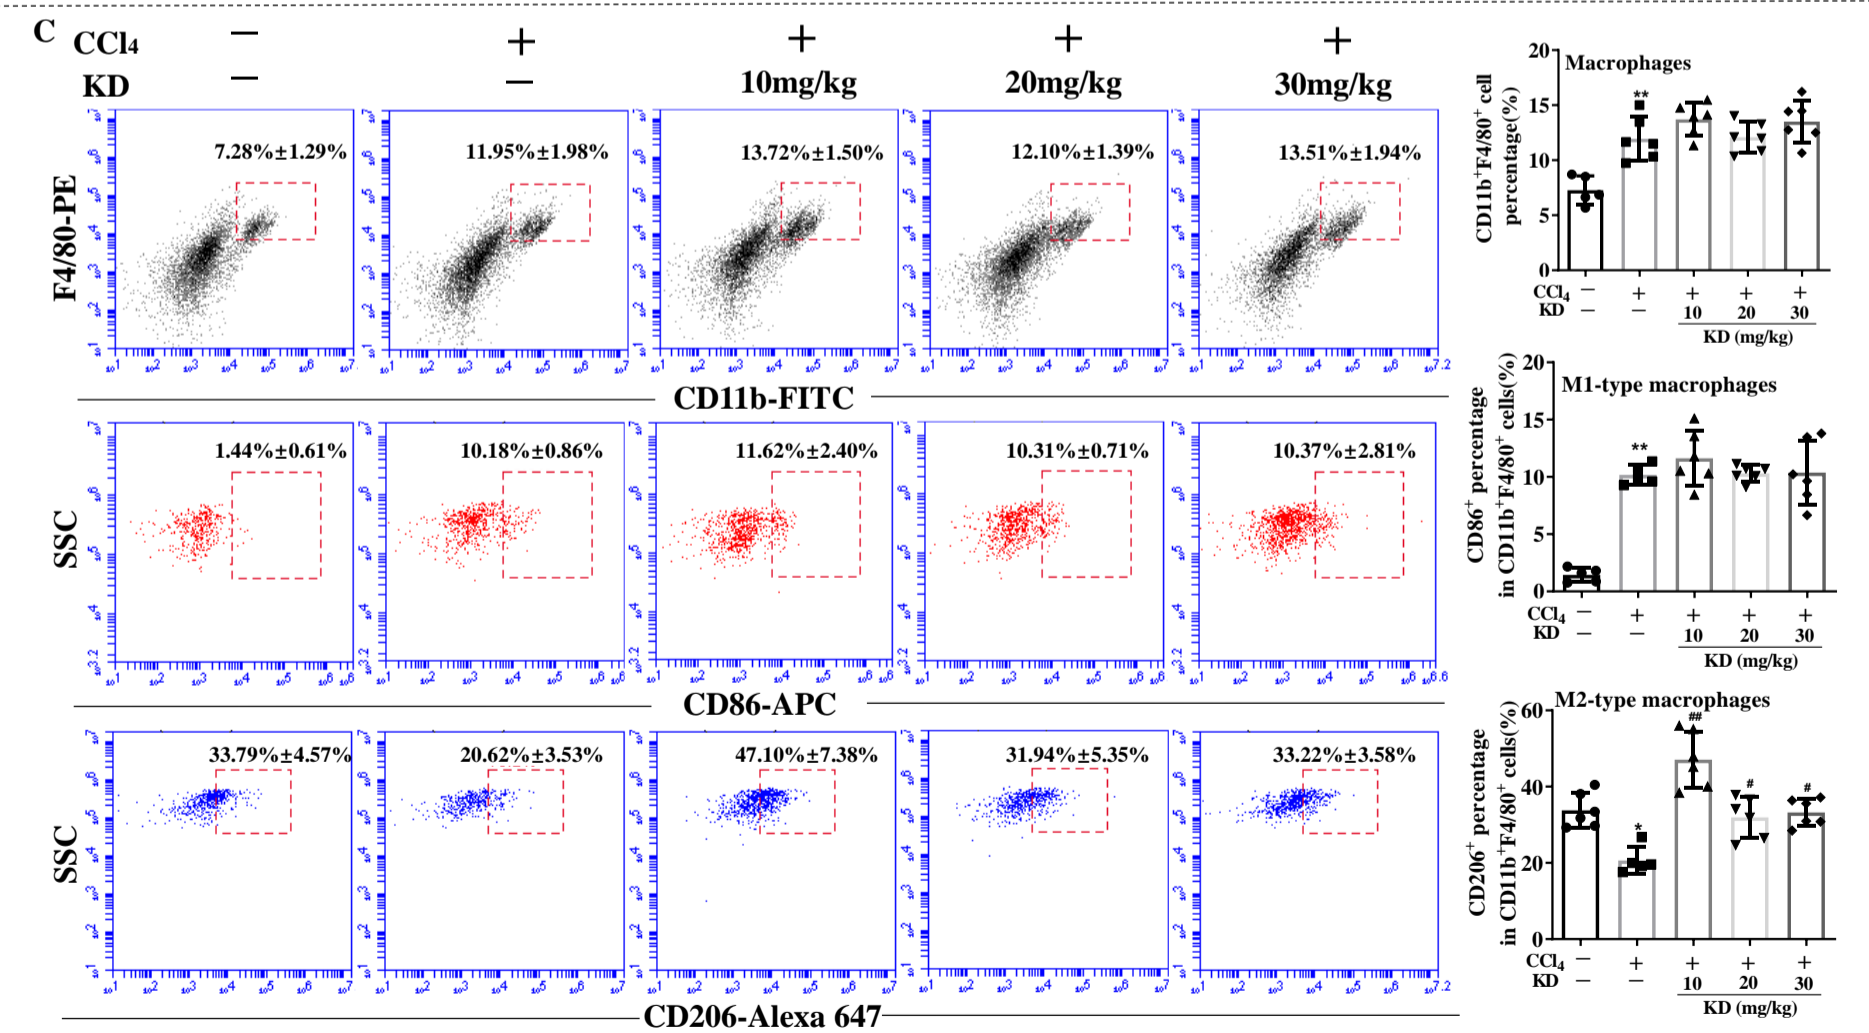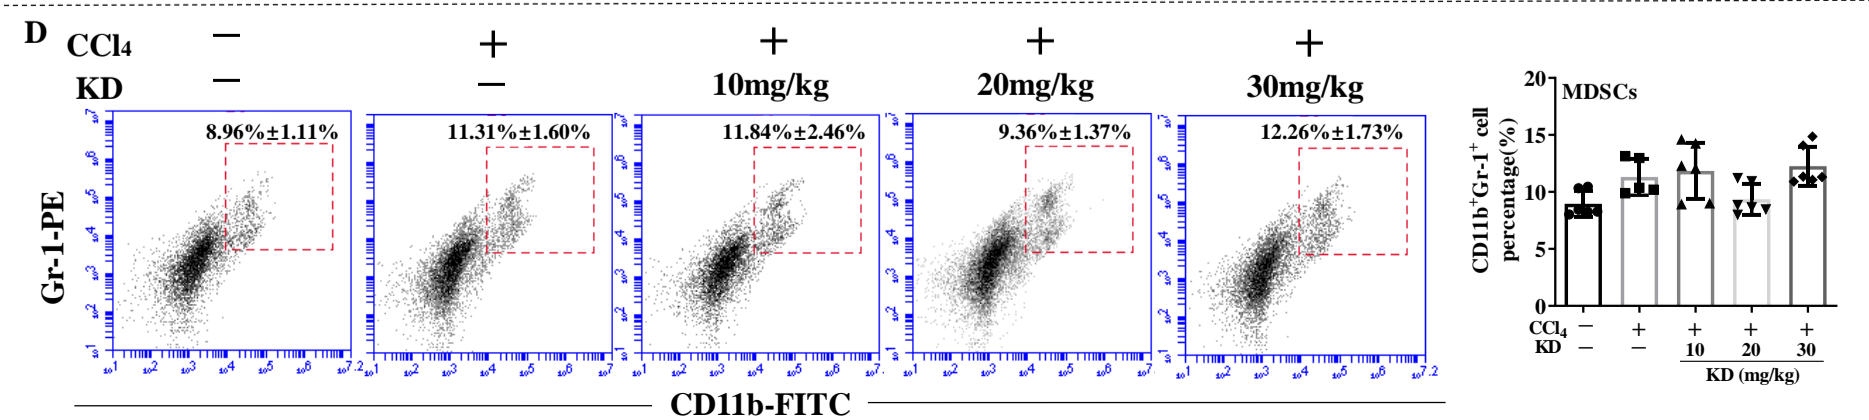

Supplement: mmc4.pdf [file mmc4.pdf]

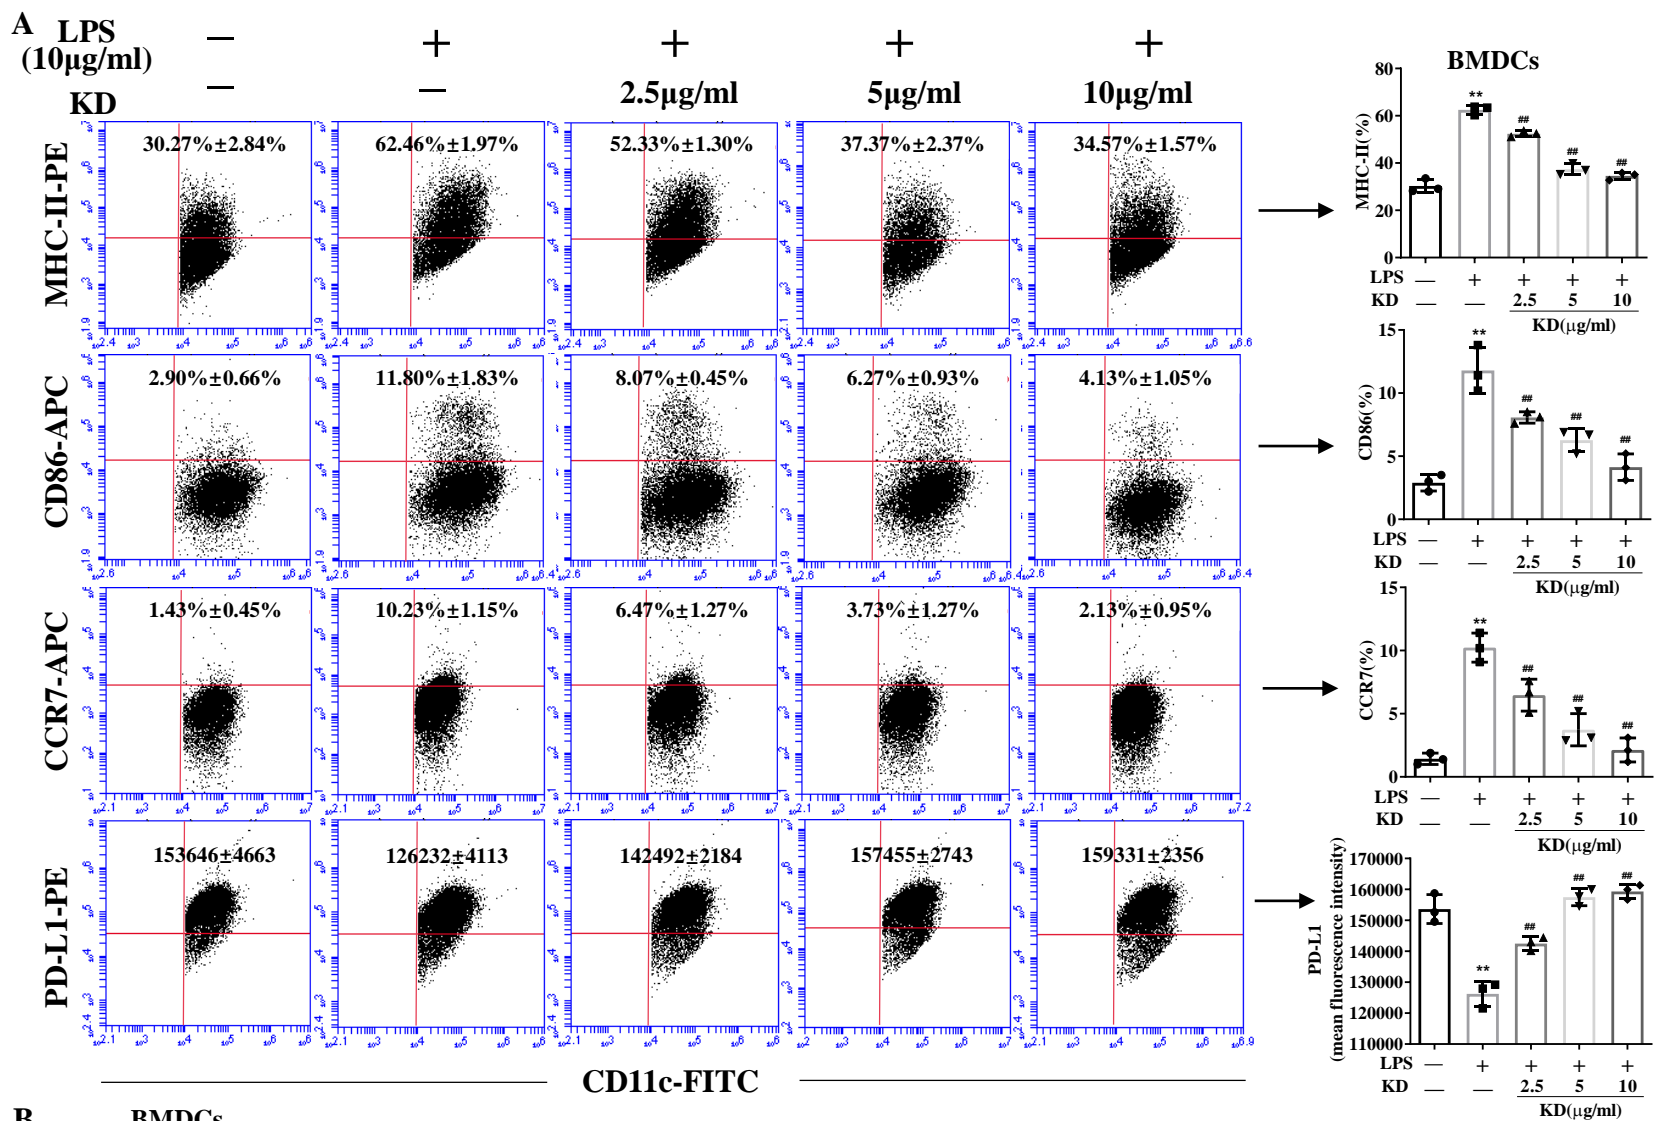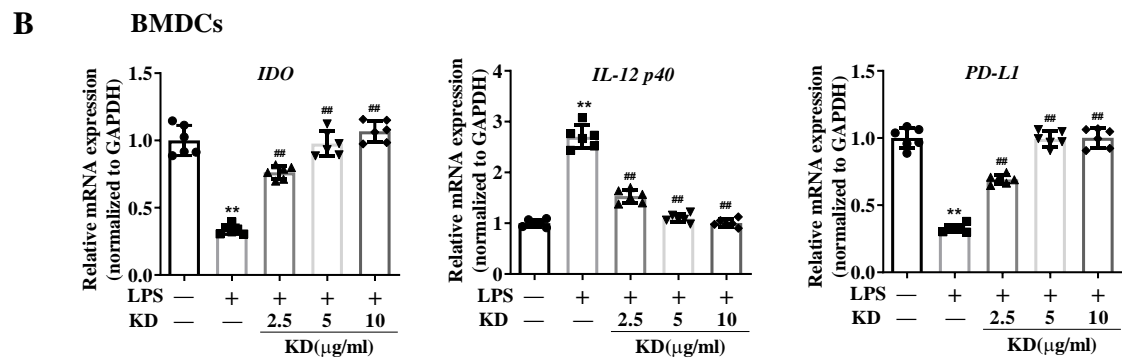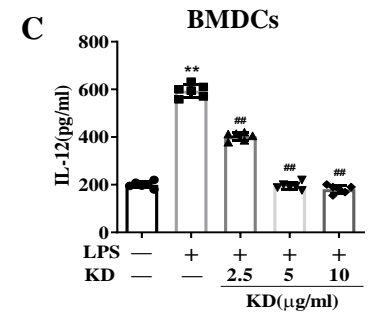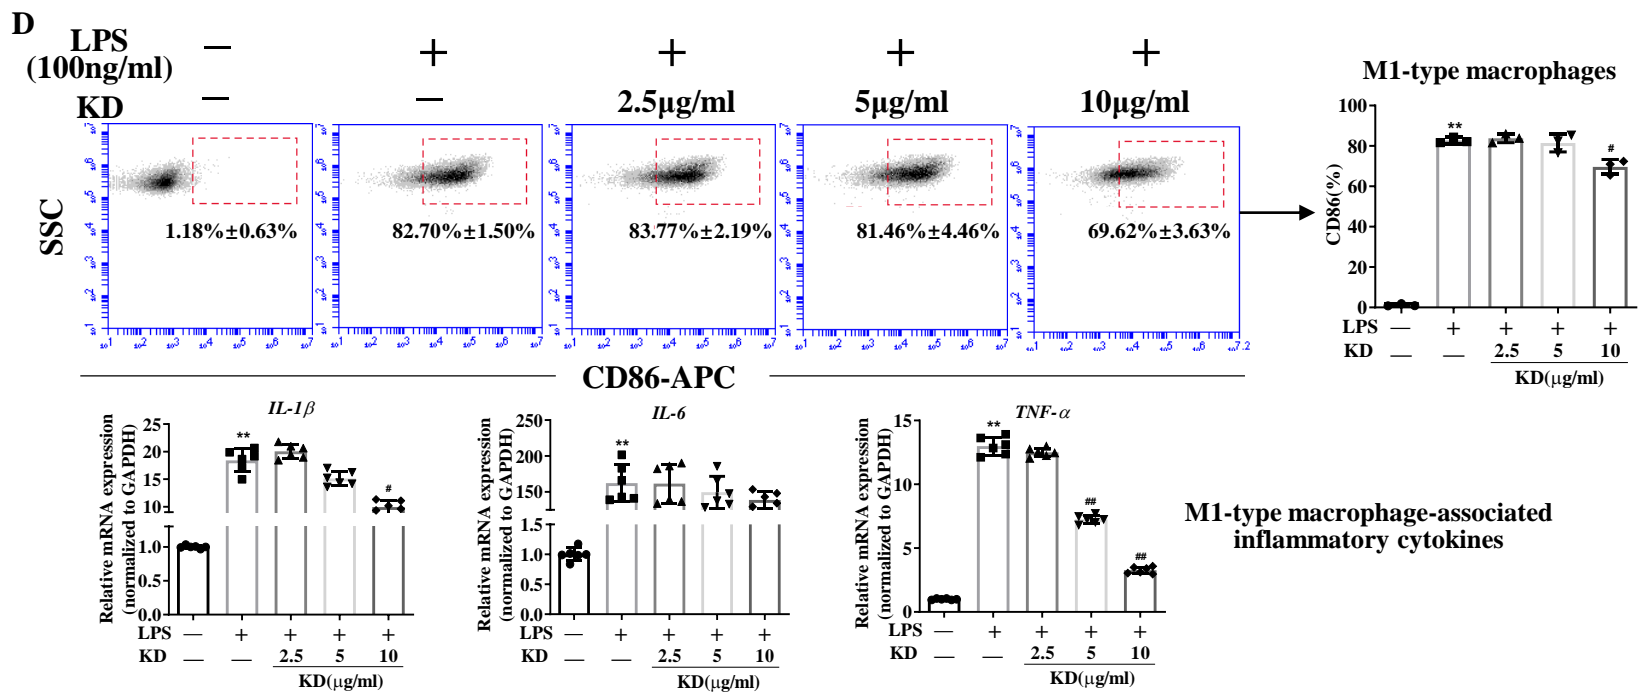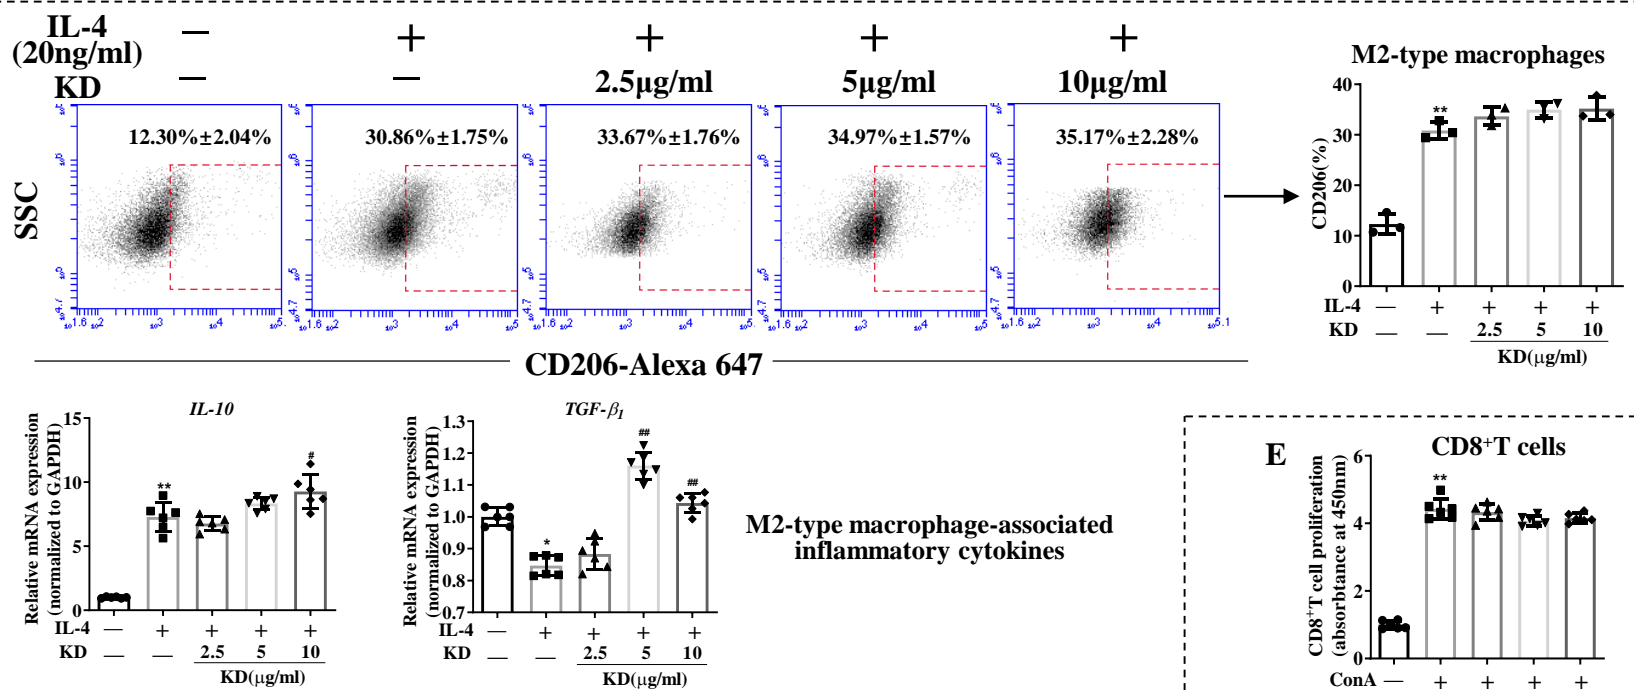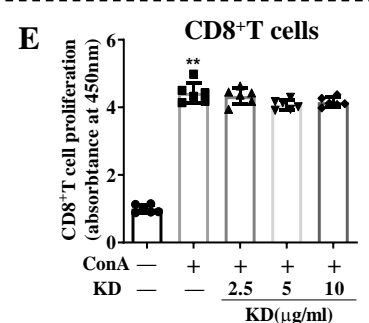

Supplement: mmc5.pdf [file mmc5.pdf]

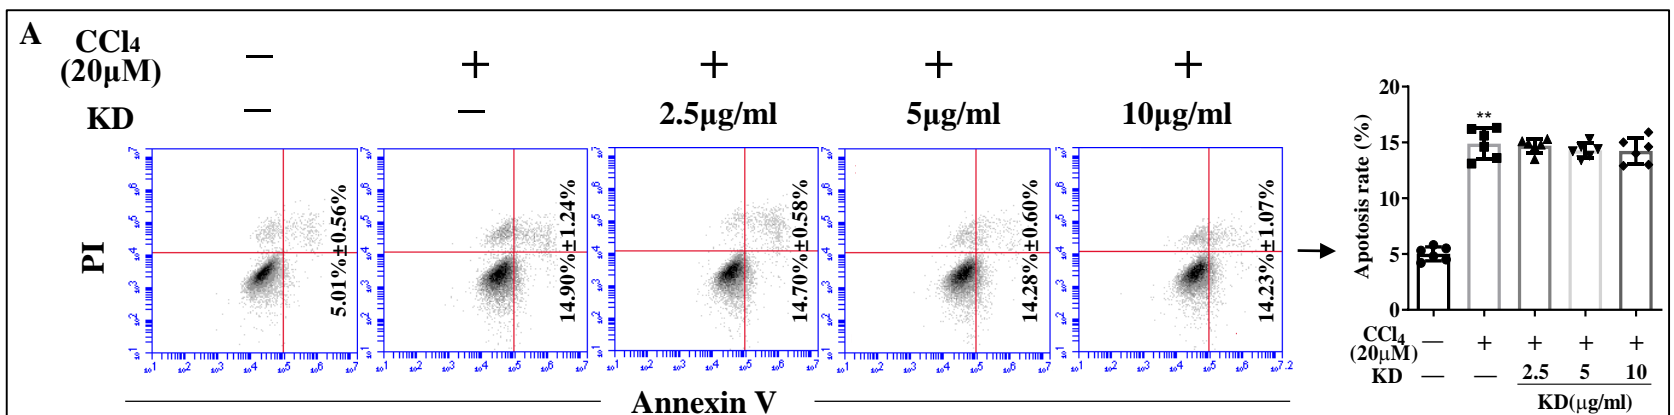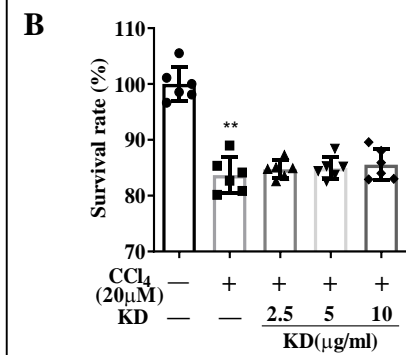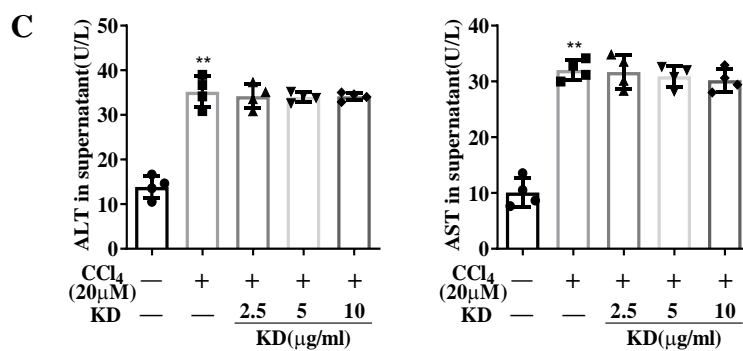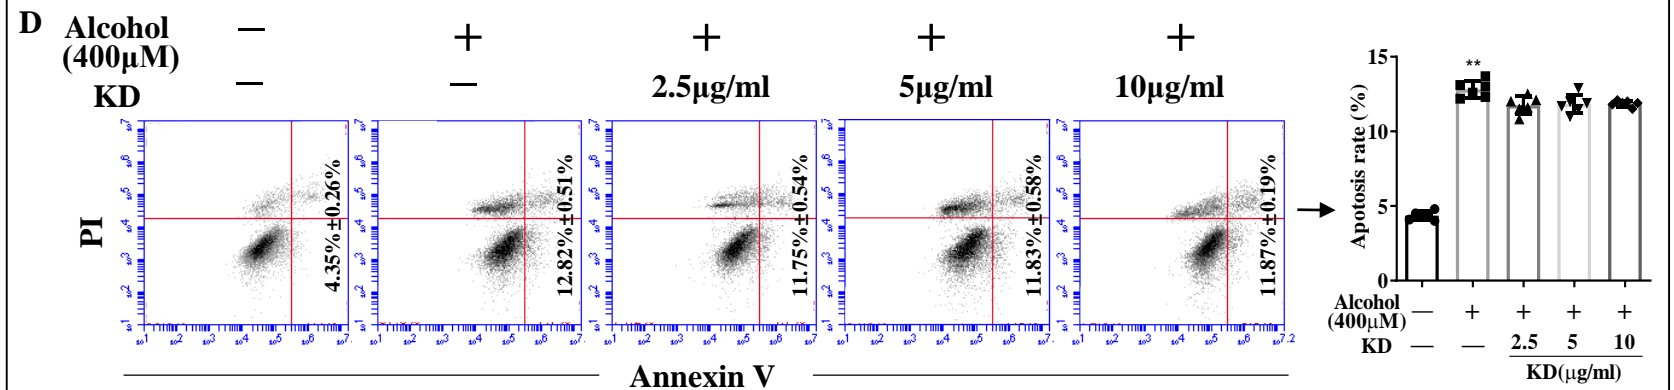

Supplement: mmc6.pdf [file mmc6.pdf]

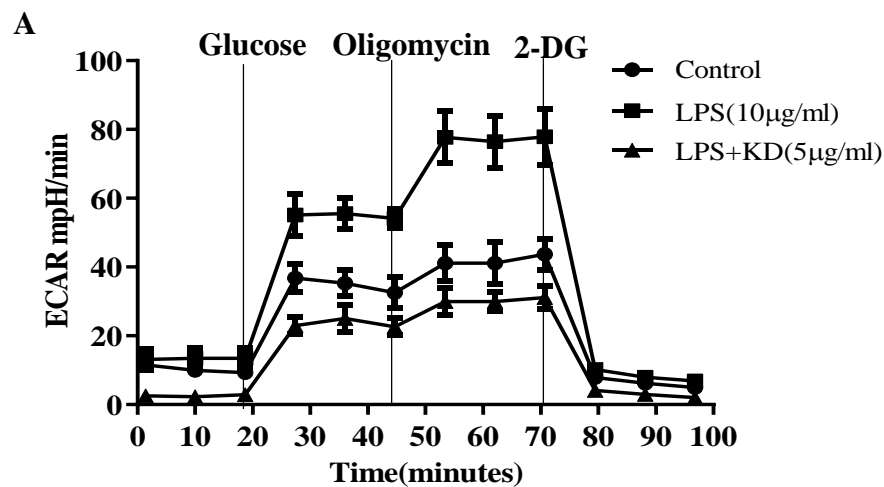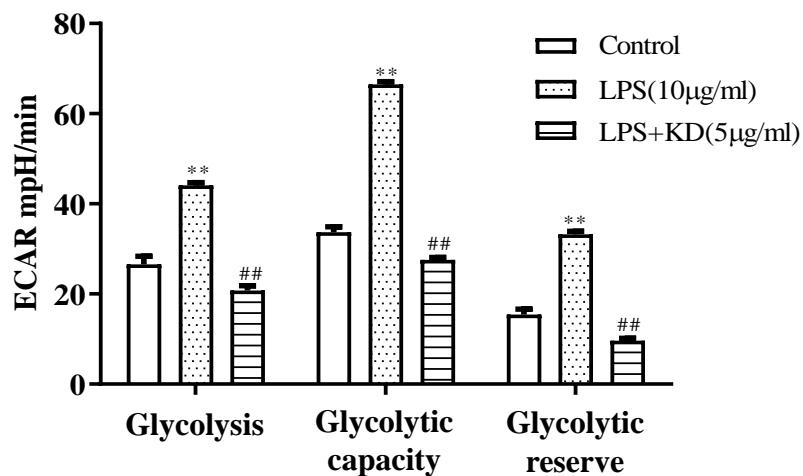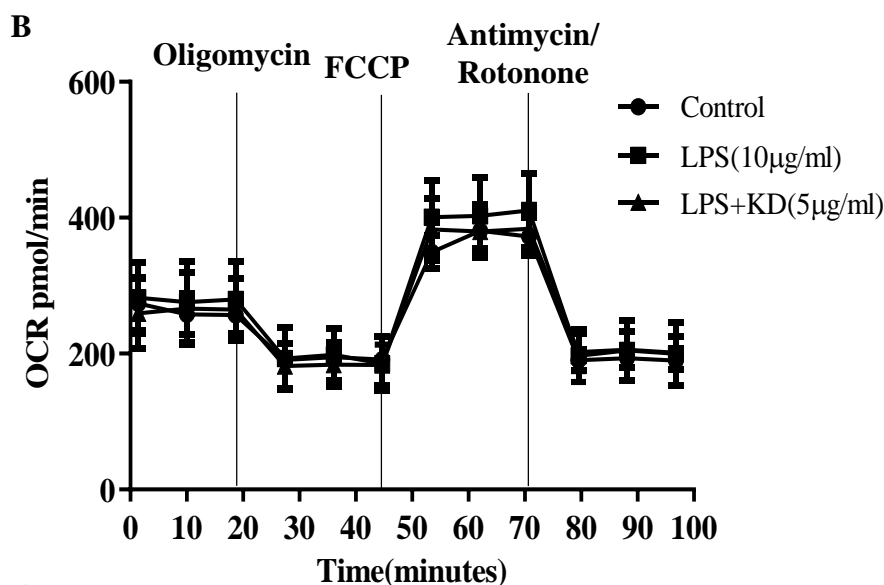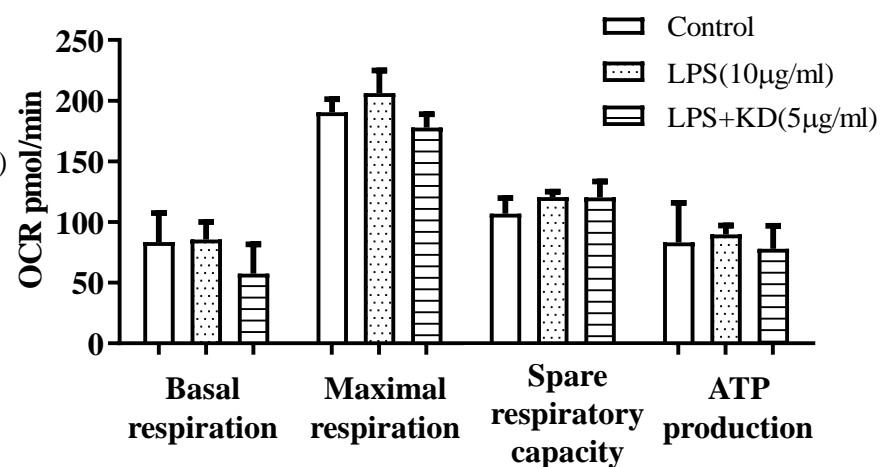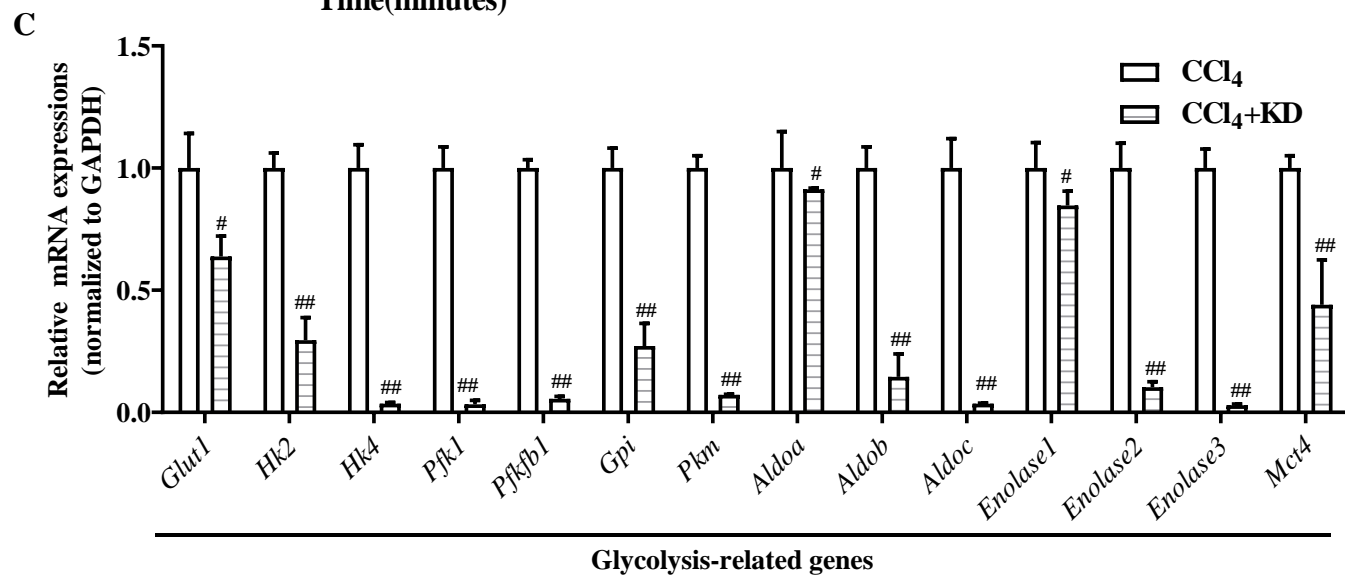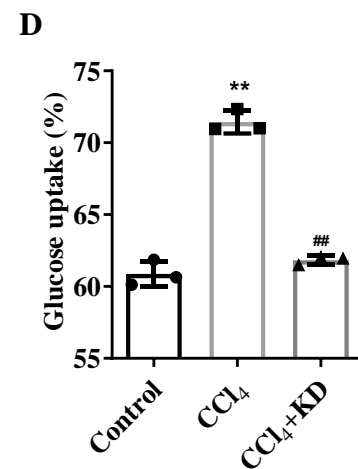

Supplement: mmc7.pdf [file mmc7.pdf]

**DiR-labeled DC**

-

**Day 1**

+

**Day 3**

+

**Day 5**

+

**Day 7**

+

**Heart**

**Lung**

**Liver**

**Spleen**

**Kidney**

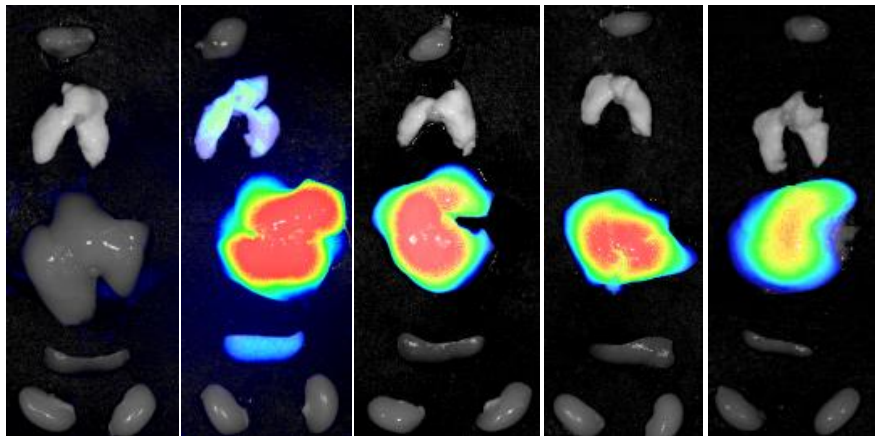

**strong**

**weak**

Supplement: mmc8.pdf [file mmc8.pdf]

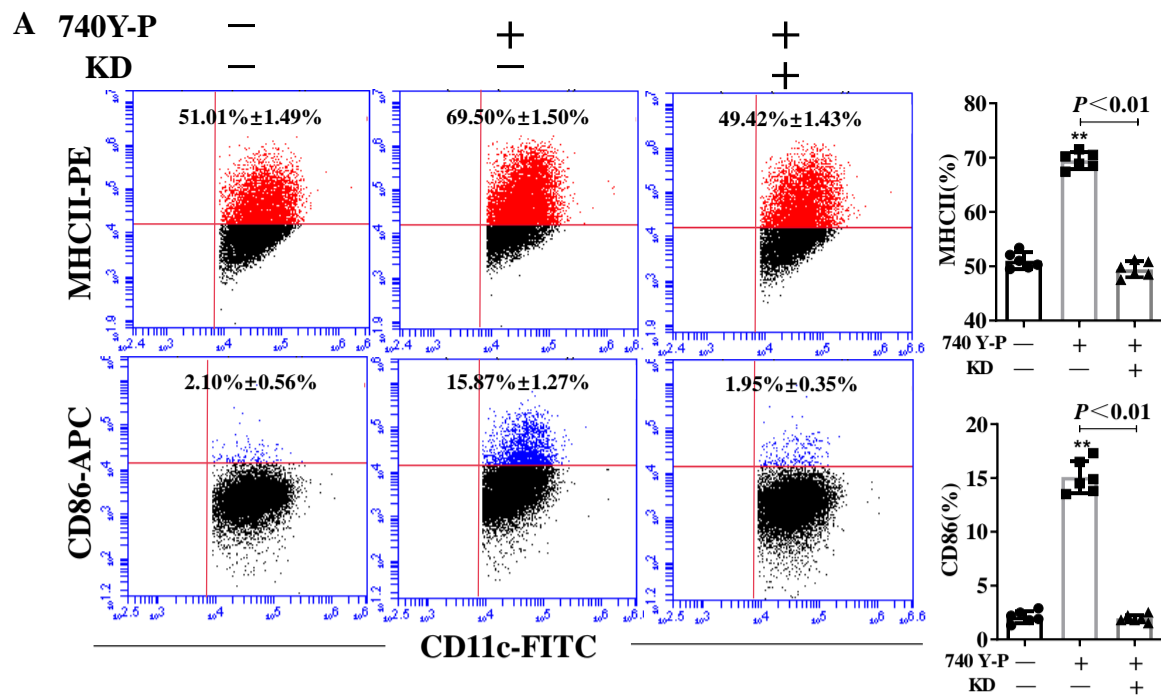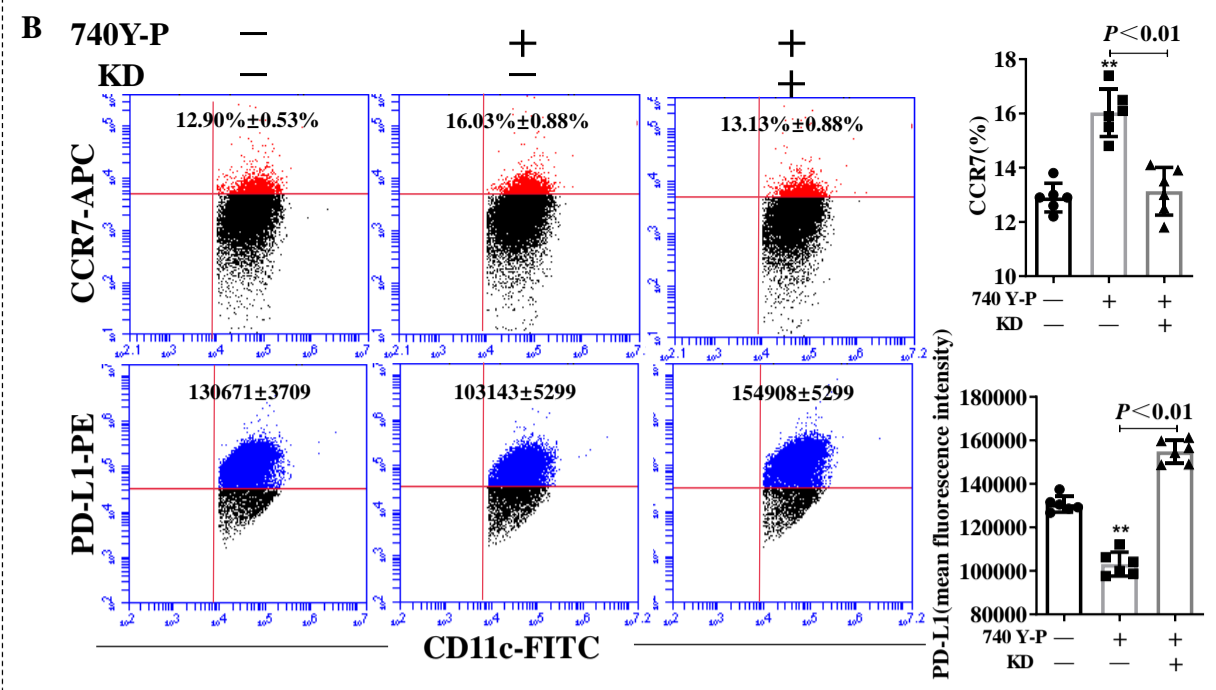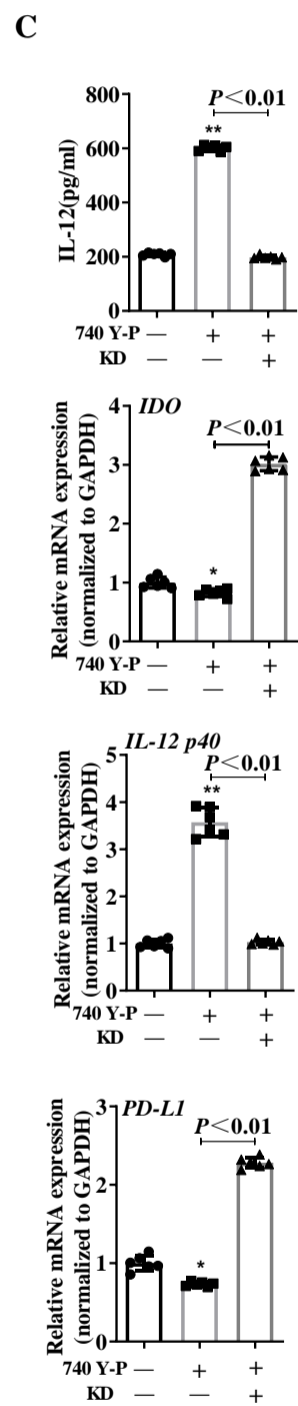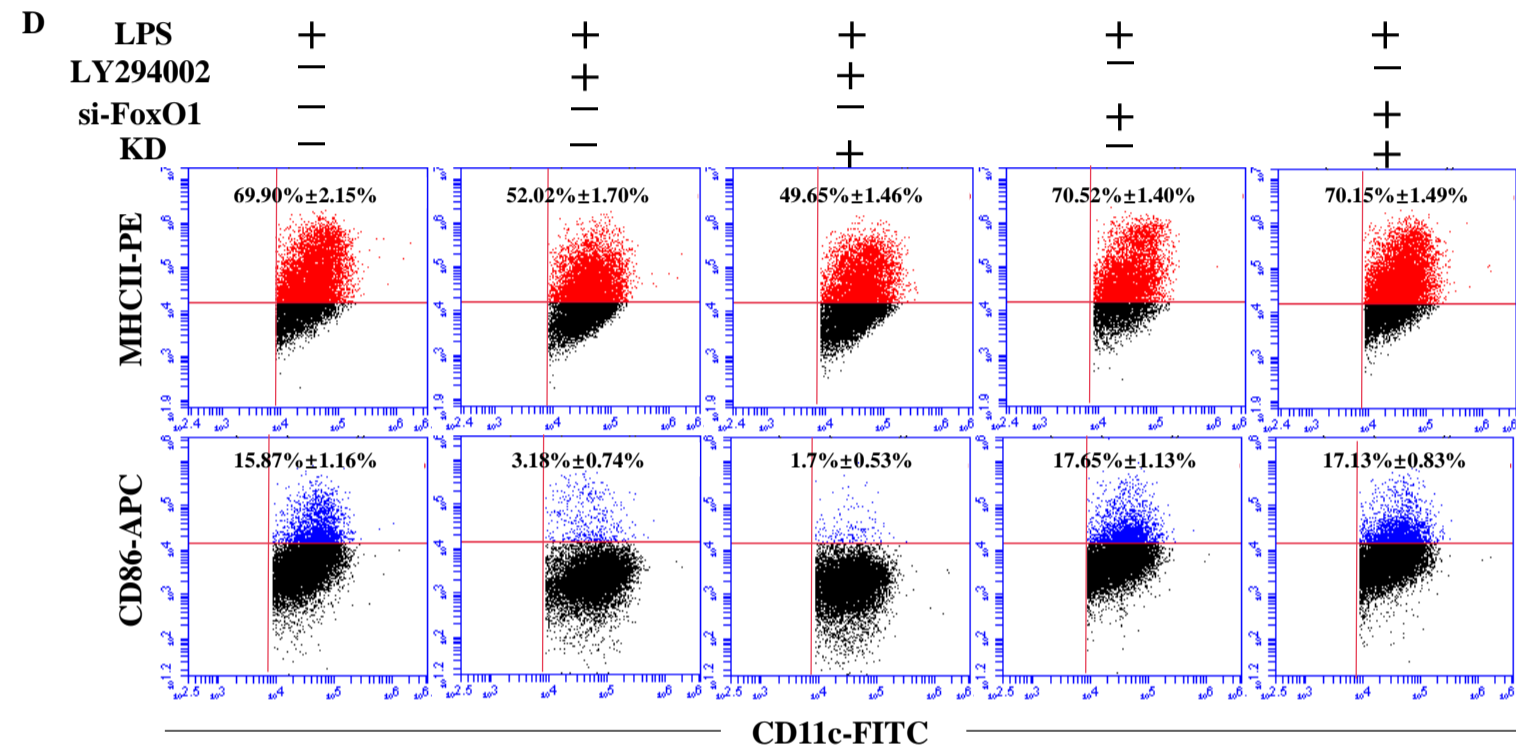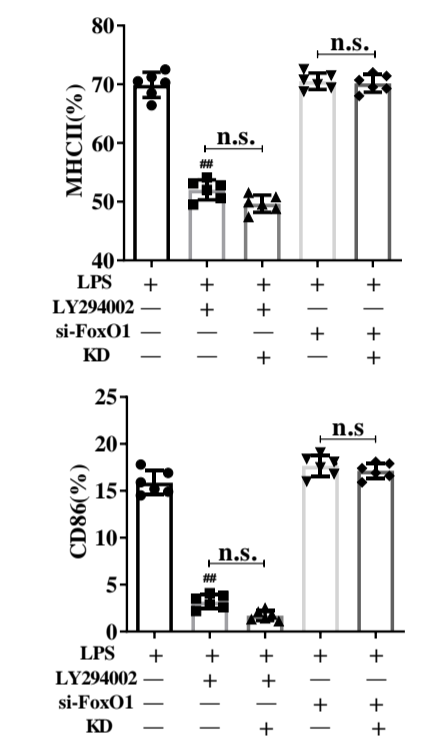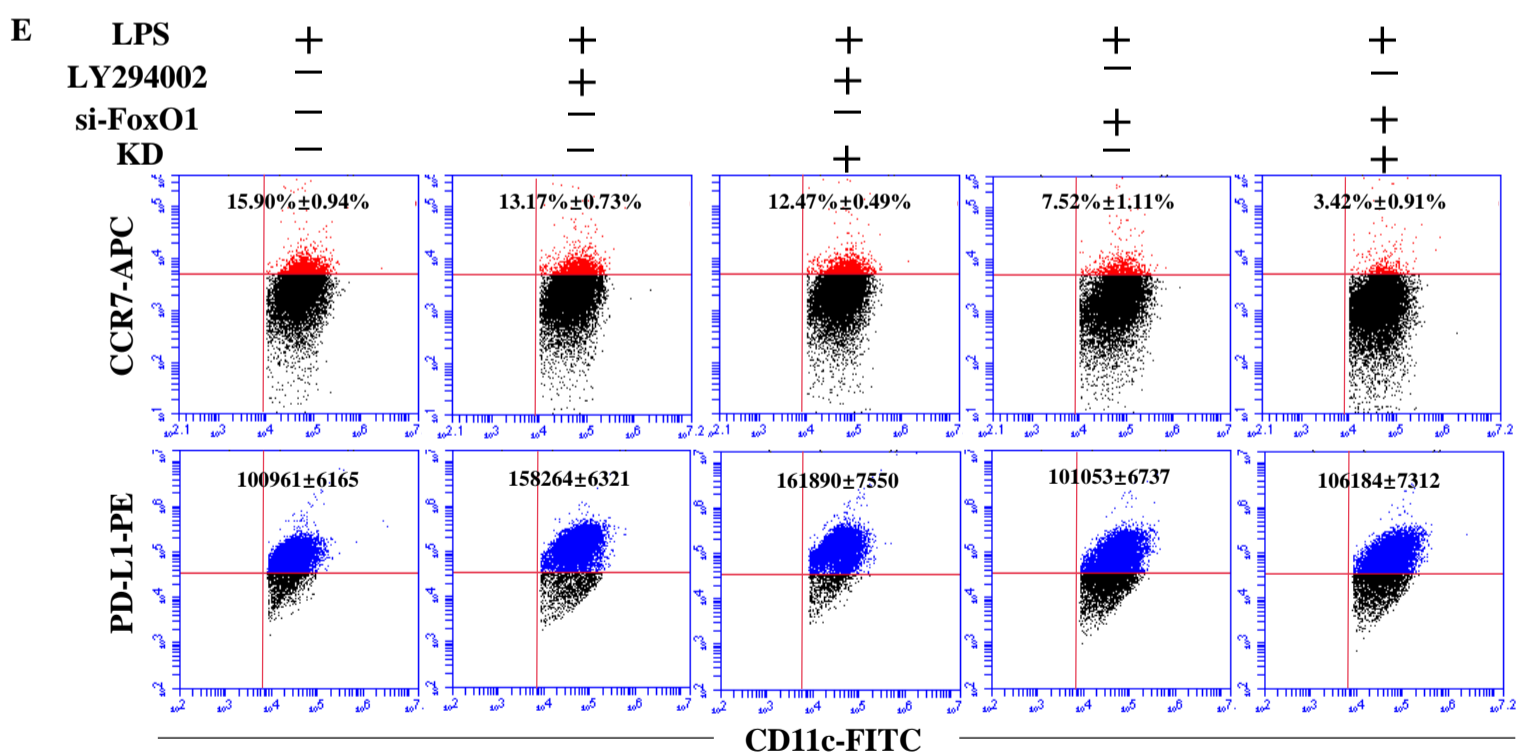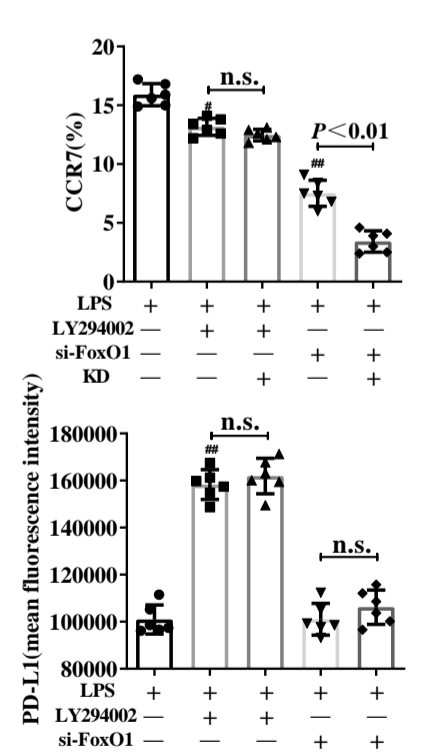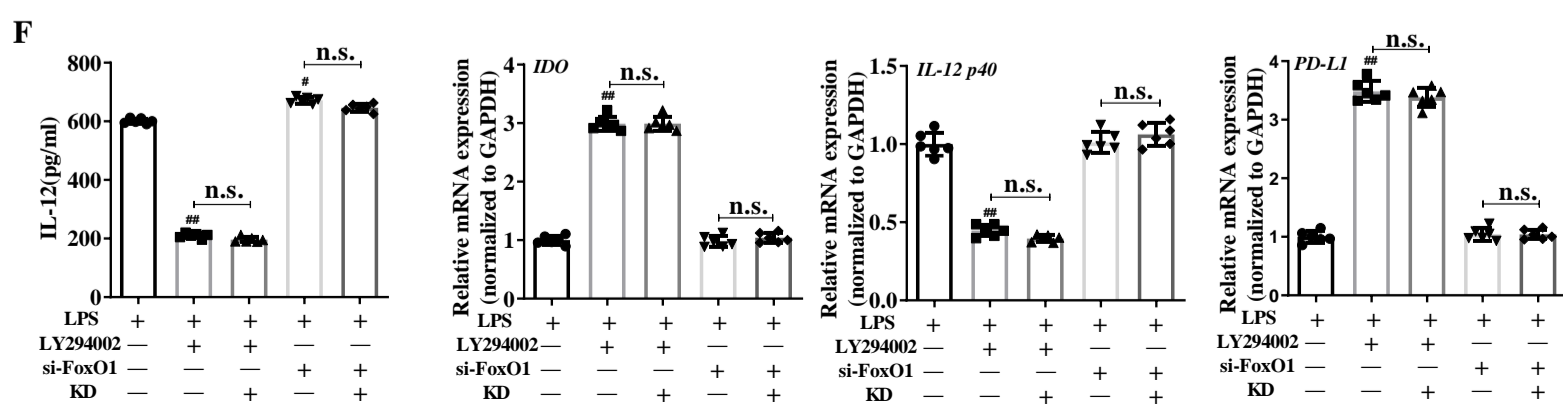

Supplement: mmc9.pdf [file mmc9.pdf]
